# Supplementary material for: Racial and ethnic enrollment disparities and demographic reporting requirements in acute leukemia clinical trials
Source: PubMed Central journal article supplement — Blood Adv. 2021 Oct 29;5(21):4352–60. doi: 10.1182/bloodadvances.2021005148 (PMC8579250; doi:10.1182/bloodadvances.2021005148), 2021-10-29
Supplement: advancesADV2021005148-suppl1.pdf [file advancesADV2021005148-suppl1.pdf]

**(A) By Trial****(B) By Patient Population****NIH**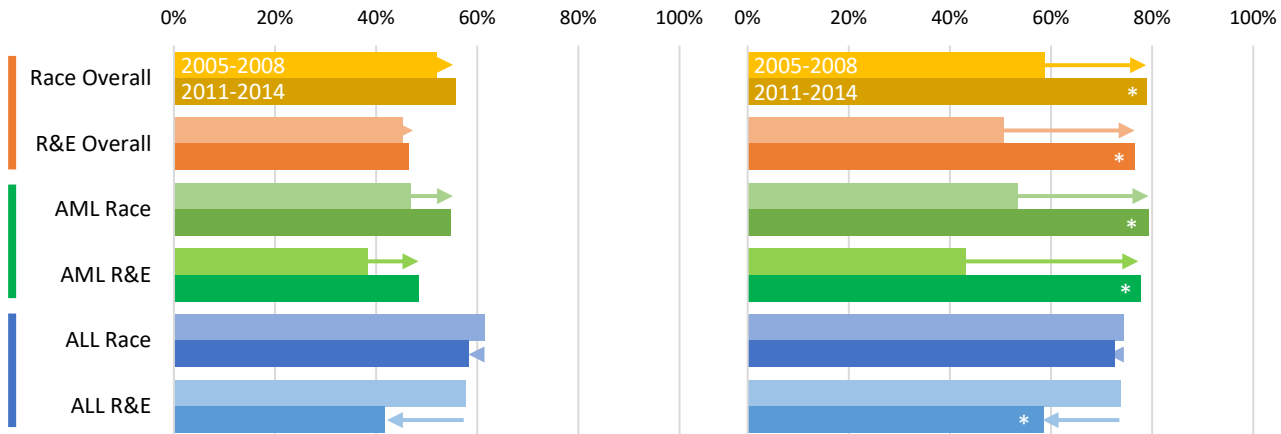**Non-NIH**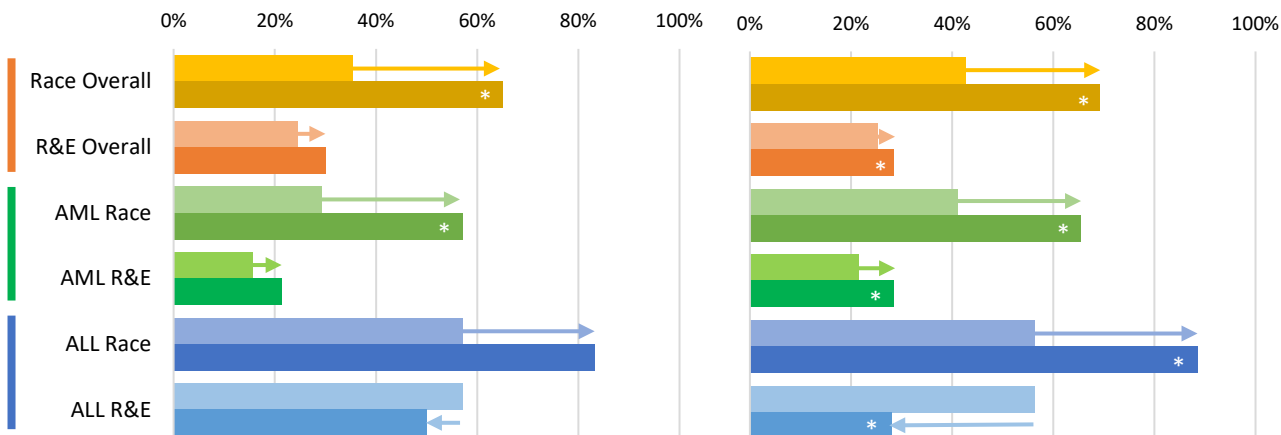**Adult**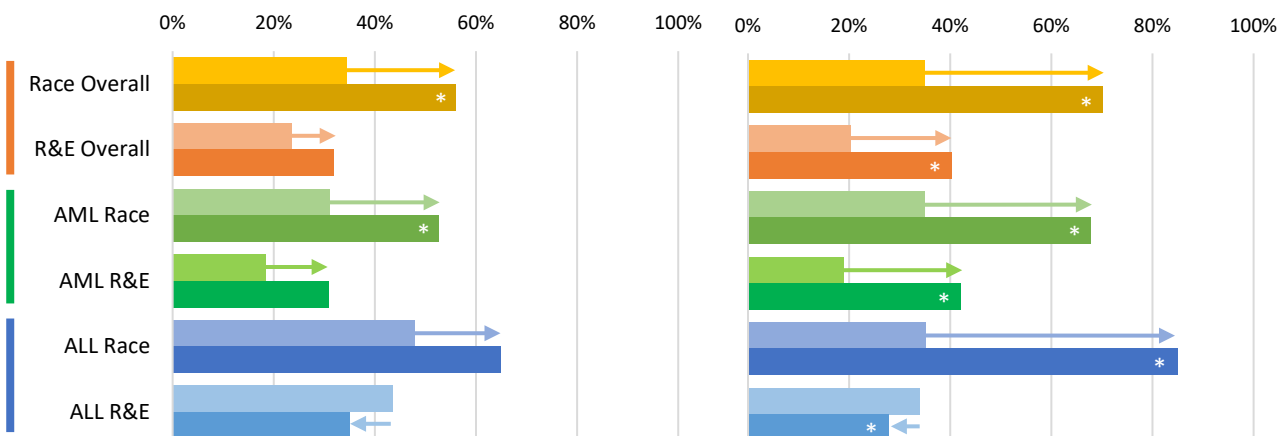**Pediatric**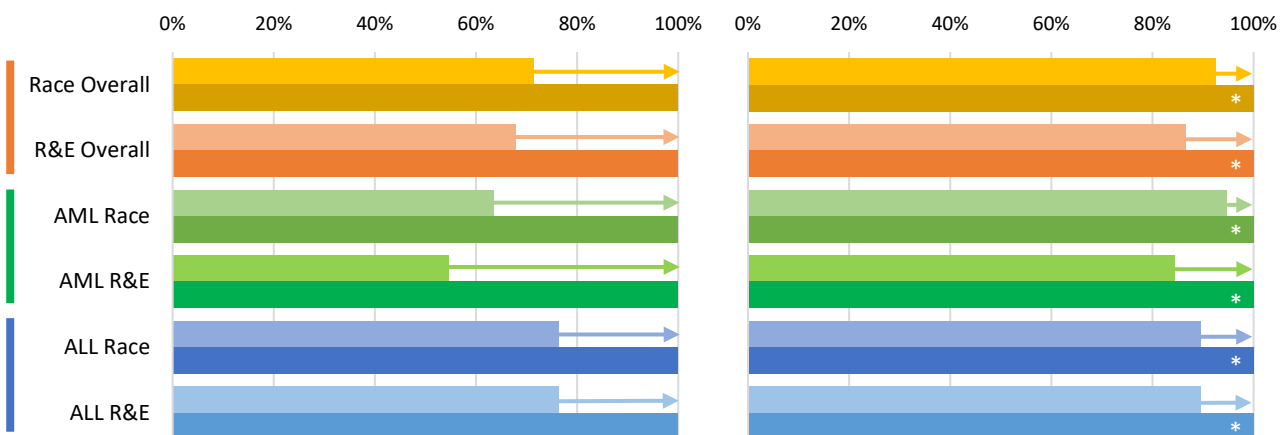

**Supplemental Figure 1.** Dyadic bar chart of reporting proportions of race and race-ethnicity by (A) trial and (B) patient population between periods before (2005-2008; top bars) and after (2011-2014; bottom bars) the reporting requirements. Proportions are shown overall and for AML and ALL individually for subgroups by trials sponsor and by age group enrolled. Arrows indicate the direction of change between the periods and asterisks denote significance below the level of  $p=0.05$ . AML indicates acute myeloid leukemia; ALL, acute lymphoblastic leukemia; R&E, race and ethnicity.
